# Supplementary material for: Evolution of the cAMP-dependent protein kinase (PKA) catalytic subunit isoforms
Source: PubMed Central journal article supplement (PMC5526564; doi:10.1371/journal.pone.0181091), 2017-07-25
Supplement: pone.0181091.s002.pdf [file pone.0181091.s002.pdf]

| Species                                                       | PKA catalytic subunit nucleotide sequence in FASTA format                                                                                                                                                                                                                                                                                                                                                                                                                                                                                                                                                                                                                                                                                                                                                                                                                                                                                                                                                                                                                                                                                                                                                                                                                                                                                                                                                                                                                                                                                                                                                                                                                                                                                                                                                                                                                                                                                                                                                                                                                                                                                                                                                                                                                                         |
|---------------------------------------------------------------|---------------------------------------------------------------------------------------------------------------------------------------------------------------------------------------------------------------------------------------------------------------------------------------------------------------------------------------------------------------------------------------------------------------------------------------------------------------------------------------------------------------------------------------------------------------------------------------------------------------------------------------------------------------------------------------------------------------------------------------------------------------------------------------------------------------------------------------------------------------------------------------------------------------------------------------------------------------------------------------------------------------------------------------------------------------------------------------------------------------------------------------------------------------------------------------------------------------------------------------------------------------------------------------------------------------------------------------------------------------------------------------------------------------------------------------------------------------------------------------------------------------------------------------------------------------------------------------------------------------------------------------------------------------------------------------------------------------------------------------------------------------------------------------------------------------------------------------------------------------------------------------------------------------------------------------------------------------------------------------------------------------------------------------------------------------------------------------------------------------------------------------------------------------------------------------------------------------------------------------------------------------------------------------------------|
| <p>Australian ghostshark<br/>(<i>Callorhynchus milii</i>)</p> | <pre>&gt;PKACa1_Callorhinchus_milii ATGGGCAACGCCACCACCAGGAAAGGGCGGCGAAGTGGACAGCGTGAAAGAATTCCTTAGAGAAAGCCAAA GAGGAGTTCCTACGGAAATGGGAGAGTCCGACACAGAACACGGCGAATCTGGAAGATTTGAAAGAACAAAA ACCCCTGGGCACAGGGTCGTTTGGCCGAGTATGCTGGTGAAGCACAAGTACACAGCAGCATTACGCCATG AAGTCTCGACAAACAGAAGGTGGTAAACTGAAGCAGATTGAACACACGCTGAATGAGAAAAGGATTCCTT CAGGCTGTCAATTTCCCTTCTCGTGGTGGAGCTAGAGTACTCGTTCAAGGATAACTCTAATTTATATATGGTG ATGGAATACGTTTCAGGAGGAGAGATGTTTTCACATTTAAGGAGAATCGGGAGGTTTCAGTGAACCTCACGCA CGGTTTTACGCATCACAGATCGTCTTGCCTTCGAATACCTCCACTCACTCGACCTCGTCTACAGAGACCTG AAGCCTGAAAACATACTGATCGACCAATATGGATACATCCAGGTGACAGATTTTGGCTTTCAGAGAGATA AAGGGCAGAAGTGGACGCTATGTGGGACTCCCGAATACCTGGCTCCTGAGATCATCCTCAGCAAGGGCTAC AACAAAGCTGTGGATTGGTGGGCGTTAGGGGTCCCTCATTACGAATGGTGTGGTTACCCCCATTTTPTT GCAGACCAGCCTATTCAGATTTATGAGAAGATAGTCTCTGGAAAGGTCCGGTTTCCGTCATTTTCAGCTCA GACCTGAAAGACCTGCTGCGAAACCTGCTGCAGGTTGACCTGACCAACCGTTGCGGAACTCAAGAAGCGG GTCAACGACATCAAGAACCACAAGTGGTTTGGCATCACAGACTGGATCGCCATCTACCAGAAAAGGTTGAA CCTCCTTTTATACCAAAGTACAAAGGTCCCGGCGACTCCAGCAACTTTGACGACTATGAAGAAGAGGAGGTC CGAGTGTCTGTACCAACAATGTTCCAAGGATTTCTGGACTTCTAG  &gt;PKACb1_Callorhinchus_milii ATGGGAAACACTGCGACAGCCAAAAGGGCAACGAAATTGAGAGCGTGAAAGAGTTCCTTAGCCAAAGCCAAA GAAGATTTCTTAAAAAATGGGAAAGTCCACAGAACACTGCAGGCCTAGATGATTTTGAAGACAAAAA ACACTTGGAAACGGGTTCTTTTGGAAAGATTATGTTGGTGAACATAAAGGTACAGAGCAGTACTACGCCATG AAGATATTGGATAAACAGAAAGTTGTCAAACCTGAAGCAATAGAGCATACTCAATGAGAAAAGAATATTG CAAGCTGTTAATTTCCCATTTCTGGTGAAGTTGGAGTATTCCTTTAAGGACAACCTCAATTTATATATGGTG ATGGAGTACGTTCCAGGTGGTGAATGTTTTCACATCTTAGGAGAATTGGAAGGTTTCAGTGAACCTCATGCA CGATTTTATGACAGTCAAAATAGTCCCTGACCTTTGAGTACCTCCATTCCTAGACCTCATCTACAGAGATCTG AAGCCAGAAAACCTTTAATTTGACCAACAAGGATACATCCAGGTACAGATTTTGGTTTTGCAAAAAAGGTA AGGGGCAGAAGTGGACGCTTTGTGGAACCTCCAGAATACTTGGCTCCAGAGATTTCTCAGCAAGGGCTAC AACAAAGCAGTGGACTGGTGGGCGCTGGGGGTTCTAATCTATGAATGGCAGCTGGATATCCTCCTTTCTTT GCAGACCAGCCTATACAGATCTATGAAAAGATTGCTCTGGAAGGTACGGTTCCCTTCTCACTTCAGTTCA GACCTGAAAGACCTGCTGCGAAATTTACTTCAGGTAGATCTGACCAACAGATATGGGAACTCAAGAACGGT GTGAATGACATTAAGAACCACAAGTGGTTTGGCACTACAGATTGGATTGCCATTTATCAGAGAAAAGTGGAA GCGCCATTCATACCAAAGTGCAGAGGTCTGGAGATACAGCAATTTTGATGATATGAAGAGGAGGACATC CGTGTCTCTTTAACCGAAAAGTGTGCTAAAGAATTTGCTGATTTTATAG</pre>                            |
| <p>Sea lamprey<br/>(<i>Petromyzon marinus</i>)</p>            | <pre>&gt;PKACx1_Homolog1_Petromyzon_marinus ATGGGGAACGCGCGCGGACAAAGAAAGGGGGCGAGGCGGAGAGCGTGAAAGAGTTCCTGGCGAAGGCGAAG GAAGATTTTATGCGAAAATGGGAAAACCCACAGCAGAACACGTCGTCGCTGGAGGACTTTGAGCGAATAAAG ACGCTTGGCACAGGCTCGTTCGGCCGCGTCATGCTCGTCAAGCACAAGTCCAGCGACCAAGTTTTTCGCCATG AAGTCTCTCGACAAACAGAAGGTGGTCAAGTTAAAACAAGTGAACACACGCTCAATGAGAAAACGCTCCTG CAGGCCATCAGCTTCCCTTCTCGTGGCCTCGAATACAGCTTCAAGGACAATTCACCTCTACATGGTG CTGGAGTACGTGCCCGGTGGAGAGATGTTCTCACATCTGCGCAGGATCGGCCGCTTCAGTGAAGCCTCACCTCA CGGTTCTACGCGGCACAAAATCGTGTGGCGTTCGAGTACCTGCACTCGTGGACCTCATCTACCGGGACCTC AAGCCTGAGAACCTCCTTATTGACCAGCAAGGATACATCCAGGTGACAGACTTTGGGTTTGGGAACTGCTAAGAACGGT AAGGGGCGAACCTGGACTCTGTGTGGAACACCAGAGTATCTGGCTCCCGAGATCATCCTCAGCAAGGGCTAC AACAAAGCGGTTGACTGGTGGGCGCTGGGCGTGCATCTATGAGATGGCGGCTGGATACCCGCCATTTCTTC GCCGACCAACCCATCCAGATATACGAGAAGATCGTCTCTGGAAAGGTGCGGTTCCCTTCTCACTTCAGCTCG GACCTCAAGGACCTGCTGAGGAACCTGCTGCAAGTGGACCTCACCAAGCGATTGCGAAAACCTCAAGAACGGT GTCAACGACATCAAGAACCATAAGTGGTTCTCCACCACCGACTGGATCGCAATTTACCAACGCAAGGTCGAG GCTCCTTCTATTCCCAAGTGAAGGGCCAGGCGACGCCAGCAATTTTGACGACTACGAGGAGGAGGAAATC CGCATCTCGTCCACTGAGAAGTGGCCAAAGGATTTGCCGACTTCTGA  &gt;PKACx1_Homolog2_Petromyzon_marinus ATGGGGAACAGCGGAGCCACCACGACGAGGAAAGGCAACGAGGCGGAGAGCGTGAAAGGAGTTTTTGGCCAAA GCCAAGGAAGACTTCTGAAGAAATGGGAAAACCCCAACAGAACACATCGTGCCTGGACGACTTTGAGCGG ATGAAGACGCTGGGAACGGGCTCCTTCGGGCGAGTATGCTCGTCAAGCACAAAGGCGACGAGCCGATATTC GCCATGAAGATCCTCGACAAGCAGAAGGTGGTGAAGTTAAAACAGGTGGAGCACACGCTCAACGAGAAGCGG ATCCTCCAGGCCATTAGCTTCCCTTCTCGTCAAGCTCGAGTACAGCTACAAGGACAACCTCTAACCTGTAC ATGGTGTGGAGTACGTGCCCGGGGAGAGATGTTCTCCACCTGCGGAGGATCGGACGCTTCAGCGAGCCC CACTCGCGGTTCTACGCGGCTCAGATCGTCTGGCGTTCGAGTACCTGCACTCACTCGACCTCATCTACCGA GACCTCAAGCCAGAGAACCTTCTCATCGACCAGCAGGGGTACATCCAGGTACCGACTTCGGCTTTGCCAAG CGGTCFAAGGGGAGACCTGGACCTGTGCGGGACCCCGAGTACCTGGCGCCGAGATAATCTCAGTAAA GGTACAACAAGGCGTGGACTGGTGGGCGCTGGGCGTGTGGTGTACGAGATGGCGGCGGGTACCCCTTC TTCTTCGCCGACCAGCCATTCAGATCTACGAGAAAATCGTCTCCGGGAAGGTGAGATTTCCCTCATCTC AGCTCAGACCTGAAGGACGTGTGAGGAACCTGTCCAGGTGGACCTCACCAAGCGCTTCGGAACCTCAAG AACGGCGTCAACGACATCAAGGGGCACAAGTGGTTCTCCACCACCGACTGGATCGCCATCTACCAGCGCAAG GTGGAGGCTCCTTTCATCCCAAGTGAAGGGCCCGGCGACGCCAGCAACTTCGACGACTACGAGGAGGAG GAGATCCGCATCTCCTCCACCGAGAAGTGGCAAAAGAGTTTGGCGACTTCTAA</pre> |

Golden eagle  
(*Aquila chrysaetos*)

```
>PKACa1_Aquila_chrysaetos
ATGGGCAACGCCGCGCCGCAAGAAGGGCGGGGAGCTGGAGAGCGTGAAGGAGTTTTGGCCCGGGCAAAG
GAGGATTTTCTCAAAAAATGGGAGAACCCAGCCAGAACACAGCCAGCCTGGAGCAGTTCGAGCGCATCCGC
ACGCTGGGGACGGGCTCCTTCGGGCGCGTCATGCTGGTGCGGCACAGGGACACGGGCCACCACTACGCCATG
AAGATTTCTCGATAAGCAGAAGGTGGTGAAGCTGAAGCAGATCGAGCACACGCTGAATGAGAAGCGGATCCTG
CAGGCTGTCACCTTCCCCTTCCTCGTCCGCTCGAGTACTCCTTCAAGGACAACTCCAACCTGTACATGGTG
ATGGAGTACATCCCGGGGGGGAGATGTTCTCCACCTCCGCCGATCGGCCGCTTCACTGAGCCCCACGCC
CGATTTCTACGCGGCCAAAATCGTGCTGACCTTTGAGTACCTGCACGCGCTTGACCTCATCTACCGGACCTG
AAACCTGAAAACCTGCTCATCGACCAGCAGGGCTACATCGAGGTGACAGATTTCCGGTTCGCCAAGCGGGTG
AAGGGCCGGACCTGGACGCTGTGCGGCACCCCGAGTACCTGGCACCCGAAATCATCCTCAGCAAGGGGTAC
AACAAGGCTGTGGACTGGTGGGCCCTGGGGGCCCTTATCTACGAGATGGCGGCCGGGTACCCCCCTTCTTC
GCCGACCAGCCATCCAGATCTACGAGAAGATCGTCTCGGGGAAGGTCCGGTTCCTCAGCACTCAGCTCG
GACCTGAAGGACCTCCTGCGCAACCTGCTCCAGGTCGACCTGACCAAGCGCTTCGGGAACCTCCGTAACGGC
GTCGCGGACATTAAGGCCACAAATGGTTCTCACCACCGACTGGATCGCCATCTACCAGCGCAAGGTGGAA
GCCCCCTTCGTGCCAAGTGCAAAGGCCCGGGGACACCAGTAACTTCGACGAGTACGAGGAGGAAGAGATC
CGCGTCTCCCTCACCGACCCTGCGCCAAGGAGTTTGCCGACTTCTAG
```
