# Supplementary material for: Evolution of the cAMP-dependent protein kinase (PKA) catalytic subunit isoforms
Source: PubMed Central journal article supplement (PMC5526564; doi:10.1371/journal.pone.0181091), 2017-07-25
Supplement: pone.0181091.s003.pdf [file pone.0181091.s003.pdf]

| Species                                                      | PKA catalytic subunit protein sequence in FASTA format                                                                                                                                                                                                                                                                                                                                                                                                                                                                                                                                                                                                                                                                                                                                                                                       |
|--------------------------------------------------------------|----------------------------------------------------------------------------------------------------------------------------------------------------------------------------------------------------------------------------------------------------------------------------------------------------------------------------------------------------------------------------------------------------------------------------------------------------------------------------------------------------------------------------------------------------------------------------------------------------------------------------------------------------------------------------------------------------------------------------------------------------------------------------------------------------------------------------------------------|
| <b>Australian ghostshark</b><br><i>(Callorhinchus milii)</i> | <pre> &gt;PKACa1_Callorhinchus_milii MGNAATARKGGEVSVKEFLAKAKEEFLRKKWESPTQNTANLEDFERTKTLGTGSFGRVMLVKHKVTTQQHYAM KILDKQKVVVKLKQIEHTLNEKRILQAVNFPFLVRLSEYSPKDNSNLYMVMEYVSGGEMFSLHRRIGRFSEPHA RFYASQIVLAFEYLSLHSLDLVYRDLKPENILIDQGYIQVTDGFAKRVKGRWTWLCGTPEYLAPEIILSKGY NKAVDWWALGVLIYEMAAGYPPFFADQPIQIYEKIVSGKVRFPSPHFSSDLKDLLRNLLQVDLTKRFGNLKNG VNDIKNHKWFATTDWIAIYQKKEVPPFIPKYKGGDSSNFDDYEEEEVRSVVTNKCSKEFLDF  &gt;PKACb1_Callorhinchus_milii MGNTATAKKGNEIESVKEFLAKAKEDFLKKWESPQNTAGLDDFERQKTLGTGSFGRVMLVKHKGTEQYYAM KILDKQKVVVKLKQIEHTLNEKRILQAVNFPFLVRLSEYSPKDNSNLYMVMEYVPGGEMFSLHRRIGRFSEPHA RFYAAQIVLTFEYLSLHSLDLIYRDLKPENLLIDQGYIQVTDGFAKRVKGRWTWLCGTPEYLAPEIILSKGY NKAVDWWALGVLIYEMAAGYPPFFADQPIQIYEKIVSGKVRFPSPHFSSDLKDLLRNLLQVDLTKRYGNLKNK VNDIKNHKWFATTDWIAIYQRKVEAPFIPKCRGPGDTSNFDDYEEEDIRVSLTEKCAKEFADF </pre>                     |
| <b>Sea lamprey</b><br><i>(Petromyzon marinus)</i>            | <pre> &gt;PKACx1_Homolog1_Petromyzon_marinus MGNAATKKGGEAESVKEFLAKAKEDFMRKWENPQQNTSCLEDFERIKTLGTGSFGRVMLVKHKSSDQFFAM KILDKQKVVVKLKQVEHTLNEKRILQAI SFPFLVRLSEYSPKDNSNLYMVLEYPGGEMFSLHRRIGRFSEPHS RFYAAQIVLAFEYLSLHSLDLIYRDLKPENLLIDQGYIQVTDGFAKRVKGRWTWLCGTPEYLAPEIILSKGY NKAVDWWALGVLIYEMAAGYPPFFADQPIQIYEKIVSGKVRFPSPHFSSDLKDLLRNLLQVDLTKRFGNLKNG VNDIKNHKWFSTTDWIAIYQRKVEAPFIPKCKGPGDASNFDYEEEEIRISSTEKCAKEFADF  &gt;PKACx1_Homolog2_Petromyzon_marinus MGNSGATTTTRKGNEAESVKEFLAKAKEDFLKKWENPQQNTSCLDDFERMKTTLGTGSFGRVMLVKHKATDRYF AMKILDKQKVVVKLKQVEHTLNEKRILQAI SFPFLVRLSEYSPKDNSNLYMVLEYPGGEMFSLHRRIGRFSEPHS HSRFYAAQIVLAFEYLSLHSLDLIYRDLKPENLLIDQGYIQVTDGFAKRVKGRWTWLCGTPEYLAPEIILSK GYNKAVDWWALGVLIYEMAAGYPPFFADQPIQIYEKIVSGKVRFPSPHFSSDLKDVLRNLLQVDLTKRFGNLK NGVNDIKGHKWFSTTDWIAIYQRKVEAPFIPKCKGPGDASNFDYEEEEIRISSTEKCAKEFADF </pre> |
| <b>Golden eagle</b><br><i>(Aquila chrysaetos)</i>            | <pre> &gt;PKACa1_Aquila_chrysaetos MGNAAAA KKGGELESVKEFLARAKEDFLKKWENPAQNTASLEQFERIRTLGTGSFGRVMLVRRHRTGHHYAM KILDKQKVVVKLKQIEHTLNEKRILQAVTFPFLVRLSEYSPKDNSNLYMVMEYIPGGEMFSLHRRIGRFSEPHA RFYAAQIVLTFEYLSLHSLDLIYRDLKPENLLIDQGYIEVTDGFAKRVKGRWTWLCGTPEYLAPEIILSKGY NKAVDWWALGGLIYEMAAGYPPFFADQPIQIYEKIVSGKVRFPSPHFSSDLKDLLRNLLQVDLTKRFGNLKNG VADIKGHKWFSTTDWIAIYQRKVEAPFVPKCKGPGDTSNFDEYEEEEIRVSLTDRCAKEFADF </pre>                                                                                                                                                                                                                                                                                                                                                                                                                            |
